# Supplementary material for: Soil organic matter interactions along the elevation gradient of the James Ross Island (Antarctica)
Source: Copernicus journal article supplement (doi:10.5194/egusphere-2024-607), 2024-03-12

#####  
 Analysis of Variance Table

Response: **log10(P+1)**

|                          | Df | Sum Sq  | Mean Sq  | F_value | Pr(>F)    |
|--------------------------|----|---------|----------|---------|-----------|
| <b>log10(Altitude+1)</b> | 1  | 0.17707 | 0.177071 | 6.1959  | 0.04165 * |
| Residuals                | 7  | 0.20005 | 0.028579 |         |           |

---  
 Signif. codes: 0 '\*\*\*' 0.001 '\*\*' 0.01 '\*' 0.05 '.' 0.1 ' ' 1

Multiple R-squared: 0.4695, Adjusted R-squared: 0.3938

ASSESSMENT OF THE LINEAR MODEL ASSUMPTIONS  
 USING THE GLOBAL TEST ON 4 DEGREES-OF-FREEDOM:  
 Level of Significance = 0.05

|                    | Value   | p-value | Decision                |
|--------------------|---------|---------|-------------------------|
| Global stat        | 0.76230 | 0.9434  | Assumptions acceptable. |
| Skewness           | 0.01771 | 0.8941  | Assumptions acceptable. |
| Kurtosis           | 0.52677 | 0.4680  | Assumptions acceptable. |
| Link Function      | 0.18207 | 0.6696  | Assumptions acceptable. |
| Heteroscedasticity | 0.03575 | 0.8500  | Assumptions acceptable. |

Phosphorus vs. altitude

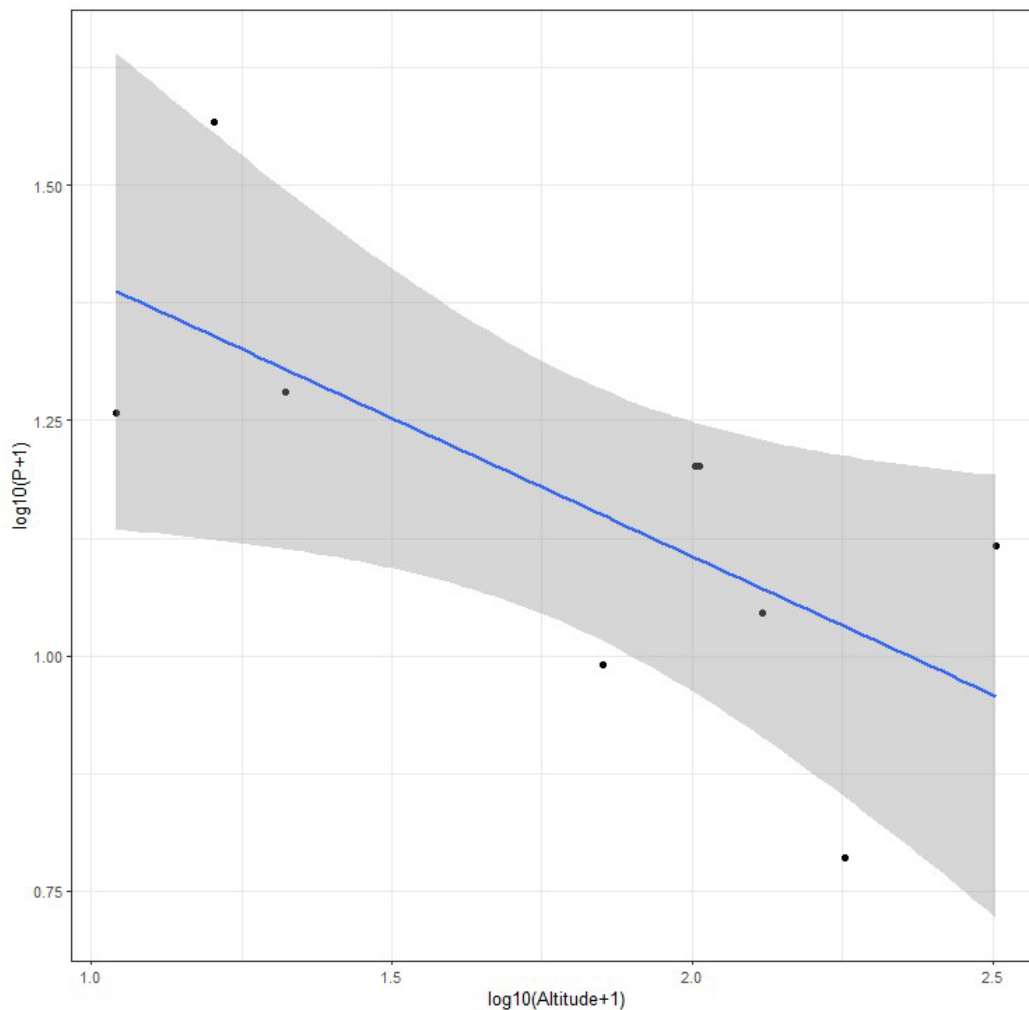

#####  
 Analysis of Variance Table

Response: **log10(SOC+1)**

|            | Df | Sum Sq  | Mean Sq | F value | Pr(>F)      |
|------------|----|---------|---------|---------|-------------|
| <b>ΔpH</b> | 1  | 1.48086 | 1.48086 | 14.629  | 0.006502 ** |
| Residuals  | 7  | 0.70859 | 0.10123 |         |             |

---  
 Signif. codes: 0 '\*\*\*' 0.001 '\*\*' 0.01 '\*' 0.05 '.' 0.1 ' ' 1

Multiple R-squared: 0.6764, Adjusted R-squared: 0.6301

ASSESSMENT OF THE LINEAR MODEL ASSUMPTIONS  
 USING THE GLOBAL TEST ON 4 DEGREES-OF-FREEDOM:  
 Level of Significance = 0.05

|                    | Value    | p-value | Decision                |
|--------------------|----------|---------|-------------------------|
| Global stat        | 0.642930 | 0.9582  | Assumptions acceptable. |
| Skewness           | 0.009467 | 0.9225  | Assumptions acceptable. |
| Kurtosis           | 0.496774 | 0.4809  | Assumptions acceptable. |
| Link Function      | 0.065113 | 0.7986  | Assumptions acceptable. |
| Heteroscedasticity | 0.071576 | 0.7891  | Assumptions acceptable. |

SOC vs. ΔpH

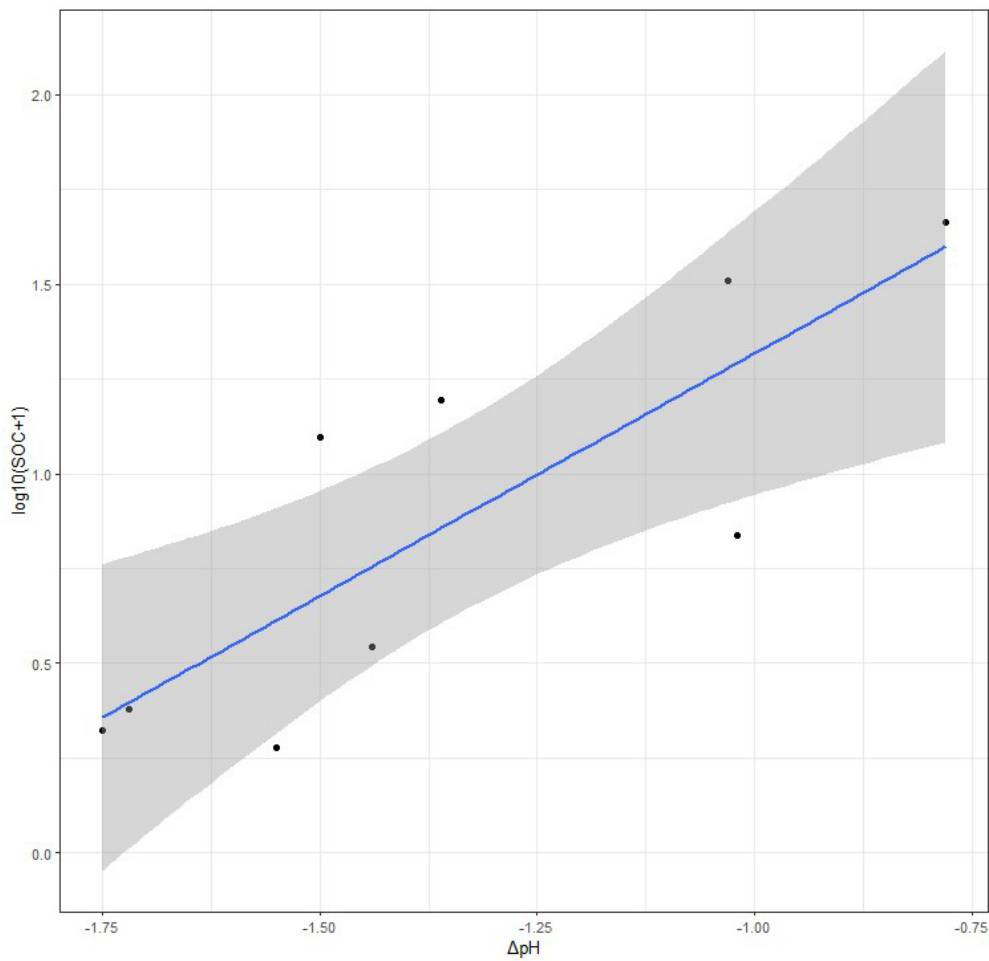

#####  
 Analysis of Variance Table

Response: GRSP

|              | Df | Sum Sq | Mean Sq | F value | Pr(>F)      |
|--------------|----|--------|---------|---------|-------------|
| log10(SOC+1) | 1  | 545470 | 545470  | 14.562  | 0.006576 ** |
| Residuals    | 7  | 262210 | 37459   |         |             |

---  
 Signif. codes: 0 '\*\*\*' 0.001 '\*\*' 0.01 '\*' 0.05 '.' 0.1 ' ' 1

Multiple R-squared: 0.6754, Adjusted R-squared: 0.629

ASSESSMENT OF THE LINEAR MODEL ASSUMPTIONS  
 USING THE GLOBAL TEST ON 4 DEGREES-OF-FREEDOM:  
 Level of Significance = 0.05

|                    | Value   | p-value | Decision                |
|--------------------|---------|---------|-------------------------|
| Global Stat        | 5.25450 | 0.2622  | Assumptions acceptable. |
| Skewness           | 1.36409 | 0.2428  | Assumptions acceptable. |
| Kurtosis           | 0.04924 | 0.8244  | Assumptions acceptable. |
| Link Function      | 2.50859 | 0.1132  | Assumptions acceptable. |
| Heteroscedasticity | 1.33258 | 0.2483  | Assumptions acceptable. |

GRSP vs. SOC

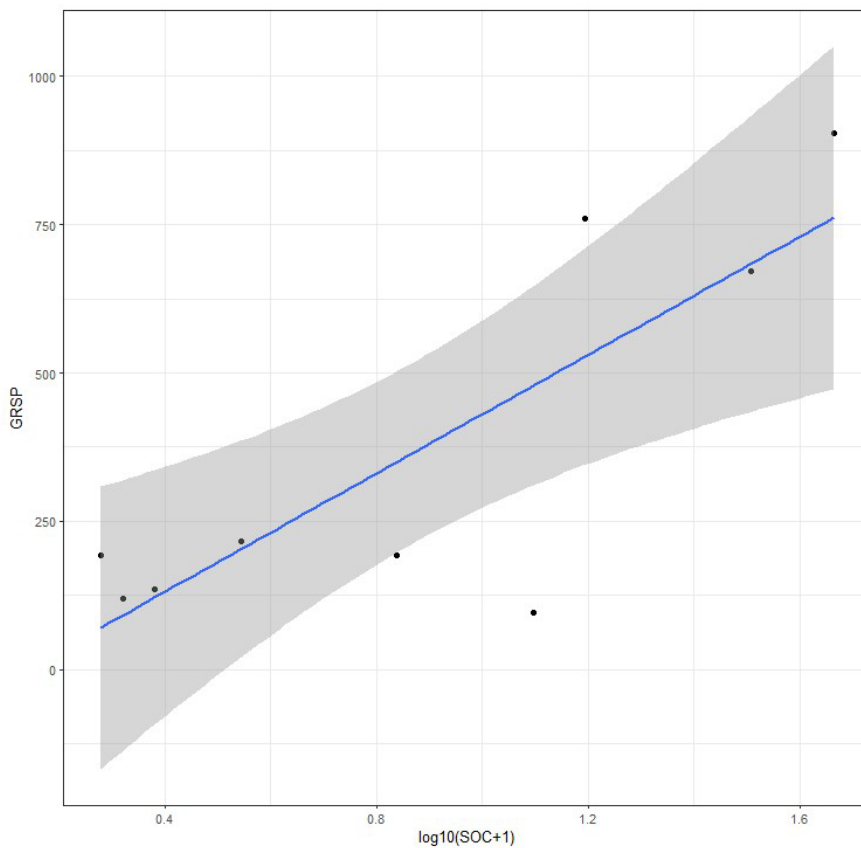

Supplement: Supplementary file [file egusphere-2024-607-AC2-supplement.pdf]
